# Supplementary material for: Systematic Discordance Between HbA1c and Continuous Glucose Monitoring-Derived Glycaemic Metrics in Paediatric Diabetes: Implications for Treatment Decisions
Source: Research Square preprint supplement (doi:10.21203/rs.3.rs-8356318/v1), 2025-12-31
Supplement: Supplementary file 1 [file daa05896a818eaf88bae1f02.docx]

**eMethod:**

**Detailed Statistical Analysis Procedures**

**Sample Size and Power Analysis**

A formal sample size calculation was not performed prospectively, as this was an exploratory secondary analysis of existing clinical data from routine continuous glucose monitoring deployment. Post hoc power analysis was conducted using G*Power 3.1.9.7 software, indicating that with n=97 patients, the study had:

- 85% power to detect correlations of r≥0.35 at α=0.05 (two-sided)
- 82% power to detect medium effect sizes (Cohen d=0.5) in group comparisons at α=0.05
- 78% power to detect R²≥0.13 in multivariable regression with 4 predictors at α=0.05

**Agreement Analysis: Bland-Altman Methodology**

**Agreement between HbA1c and GMI was assessed following Bland-Altman principles (Bland JM, Altman DG. Lancet. 1986;1(8476):307-310):**

Step 1: Calculate differences
For each patient i: Difference_i = HbA1c_i - GMI_i

Step 2: Calculate mean bias
Mean bias = Σ(Difference_i) / n

Step 3: Calculate 95% limits of agreement

- Standard deviation of differences: SD = √[Σ(Difference_i - Mean bias)² / (n-1)]
- Lower limit of agreement = Mean bias - (1.96 × SD)
- Upper limit of agreement = Mean bias + (1.96 × SD)

Step 4: Assess proportional bias
Proportional bias was tested by correlating the mean of HbA1c and GMI with their difference:

- For each patient: Mean_i = (HbA1c_i + GMI_i) / 2
- Pearson correlation: r between Mean_i and Difference_i
- If P<0.05, significant proportional bias exists (bias varies across measurement range)

**Clinical interpretation:**

- Narrow limits of agreement (e.g., ±0.5%): Good agreement, methods interchangeable
- Wide limits of agreement (e.g., >±2%): Poor agreement, methods not interchangeable
- Mean bias near zero: No systematic over/underestimation
- Mean bias far from zero: Systematic bias (one method consistently higher/lower)

**Multivariable Regression: Model Development Process**

Initial Model (9 predictors):
Age, Sex, BMI, Duration, C-peptide, TDD, TIR, Variability, Type

Multicollinearity diagnostics revealed:

- Age: VIF = 22.6 (severe)
- BMI: VIF = 35.3 (extreme)
- TIR: VIF = 22.2 (severe)
- Variability: VIF = 17.8 (severe)
- Other predictors: VIF 3-6 (acceptable)

Collinearity sources:

- Age correlated with Duration (r=0.68)
- BMI correlated with Age (r=0.52) and Sex (r=0.45)
- TIR inversely correlated with Variability (r=-0.74)

Model simplification strategy:

1. Removed TIR and Variability (highly collinear, r=-0.74)
2. Removed Age and BMI (collinear with Duration, less directly relevant to discordance mechanism)
3. Removed Sex (weakest univariable association, P=0.90)
4. Retained Duration, C-peptide, TDD, Type (all VIF <6, clinically relevant)

**Final parsimonious model (4 predictors):**Discordance = β₀ + β₁(Duration) + β₂(C-peptide) + β₃(TDD) + β₄(Type)

Model diagnostics:

- Linearity: Partial residual plots showed linear relationships
- Homoscedasticity: Scale-location plot showed constant variance
- Normality: Q-Q plot of residuals approximated normal distribution
- Independence: Durbin-Watson statistic = 1.89 (acceptable, 1.5-2.5 range)
- Influential points: No Cook's distance >1.0 (maximum = 0.23)

Sensitivity Analysis Procedures

Sensitivity Analysis 1: High CGM Adherence (≥90%)

- Rationale: Excludes patients with potential sensor malfunction or premature removal
- n=85 (12 excluded for <90% adherence)
- Recalculated: Discordance prevalence, mean magnitude, multivariable model
- Threshold: Results considered consistent if β coefficients change <20% and P-values maintain direction

Sensitivity Analysis 2: Established Diabetes (Duration ≥1 year)

- Rationale: Excludes honeymoon phase patients with residual beta cell function that may confound results
- n=91 (6 excluded for duration <1 year)
- Same recalculation approach as Analysis 1

Sensitivity Analysis 3: Stringent Discordance Threshold (>1.0%)

- Rationale: Tests if findings persist with more conservative definition of clinically meaningful discordance
- Uses >1.0% instead of >0.5% as threshold
- n remains 97, but discordant classification changes

**Exploratory Analysis Methods**

**C-Peptide Tertile Analysis:**Patients with measured C-peptide (n=63) were divided into tertiles:

- Tertile 1 (Low): <0.2 ng/mL (n=30, approximate 0th-33rd percentile)
- Tertile 2 (Intermediate): 0.2-1.0 ng/mL (n=16, 34th-67th percentile)
- Tertile 3 (High): >1.0 ng/mL (n=17, 68th-100th percentile)

Outcome comparisons across tertiles used:

- One-way ANOVA (for normally distributed outcomes)
- Kruskal-Wallis test (for non-normally distributed outcomes)
- Cochran-Armitage trend test (for linear trends across ordered categories)

Paradoxical Discordance Definition:
Among 78 patients with HbA1c overestimation (HbA1c > GMI), paradoxical pattern defined as:

- HbA1c ≥8.0% (suggesting poor control by ADA/ISPAD guidelines)
- AND Time-in-Range ≥60% (suggesting adequate control by CGM consensus)
- This represents clinical scenario where HbA1c might prompt inappropriate treatment intensification

Missing Data Assessment

C-peptide missingness analysis:
Compared patients with (n=63) vs without (n=34) C-peptide measurements:

- Age: 14.8 vs 15.1 years; t=0.31, P=0.76
- Female sex: 58.7% vs 56.1%; χ²=0.08, P=0.78
- Type 1 diabetes: 71.4% vs 70.2%; χ²=0.02, P=0.88
- HbA1c: 8.47% vs 8.51%; t=0.11, P=0.91
- Discordance magnitude: 1.53% vs 1.59%; t=0.17, P=0.87

No significant differences suggest missing completely at random (MCAR) mechanism.

Software and Computational Details

**Python packages used:**

- pandas 2.0.0: Data manipulation, cleaning, merging
- numpy 1.24.0: Numerical computations, array operations
- scipy 1.10.0: Statistical tests (t-tests, Mann-Whitney, χ², correlations)
- statsmodels 0.14.0: Linear regression, diagnostics, VIF calculations
- scikit-learn 1.2.2: Standardization, validation metrics
- matplotlib 3.7.0: Data visualization, diagnostic plots
- seaborn 0.12.0: Statistical graphics, heatmaps

**Reproducibility:**Complete analysis code (Jupyter notebooks) and deidentified data are available from the corresponding author upon reasonable request, subject to institutional ethics committee approval and execution of data use agreement.

**Result:**

**eTable 1.** Sensitivity analyses demonstrating robustness of primary findings. C-peptide remained an independent predictor of discordance magnitude across all analytic scenarios

| **Analysis** | **n** | **Discordance %** | **Mean (SD)** | **C-peptide β** | **P-value** |
| --- | --- | --- | --- | --- | --- |
| Primary | 97 | 83.5% | 1.55 (1.69) | -0.344 | 0.045 |
| ≥90% adherence | 85 | 84.7% | 1.58 (1.71) | -0.35 | 0.04 |
| Duration ≥1 yr | 91 | 83.5% | 1.53 (1.68) | -0.33 | 0.046 |
| Threshold >1.0% | 61 | 62.9% | — | -0.38 | 0.04 |

**eTable 2.** Dose-response relationship between C-peptide level and glycemic outcomes. Both discordance magnitude and Time-in-Range demonstrated statistically significant trends across C-peptide tertiles.

| **Tertile** | **n** | **C-peptide (ng/mL)** | **Discordance (%)** | **TIR (%)** | **P trend** |
| --- | --- | --- | --- | --- | --- |
| Low (<0.2) | 30 | <0.2 | 1.98 (1.82) | 48.1 (14.2) |  |
| Intermediate | 16 | 0.2-1.0 | 1.45 (1.58) | 60.6 (15.8) |  |
| High (>1.0) | 17 | >1.0 | 0.82 (1.41) | 72.4 (14.9) |  |
|  |  |  | 0.02 | <0.001 |  |

**eTable 3.** Clinical phenotype classification based on residual beta cell function and discordance patterns. Phenotype C (depleted function) demonstrated disproportionate HbA1c overestimation despite similar GMI values compared with Phenotype A.

| **Phenotype** | **n (%)** | **C-peptide** | **Discordance** | **HbA1c** | **GMI** | **TIR** | **CV** |
| --- | --- | --- | --- | --- | --- | --- | --- |
| A (Preserved) | 15 (15.5%) | >1.0 | ≤1.0% | 7.2 (1.3) | 6.5 (1.2) | 74.1 (14.8) | 31.2 (7.9) |
| B (Intermediate) | 28 (28.9%) | 0.2-1.0 | 1.0-2.0% | 8.3 (1.5) | 7.0 (0.9) | 59.4 (15.2) | 37.8 (8.6) |
| C (Depleted) | 19 (19.6%) | <0.2 | >2.0% | 9.8 (1.6) | 7.4 (0.8) | 47.3 (13.6) | 45.1 (9.2) |
